# Supplementary material
Source: PubMed Central journal article supplement (PMC10655859)
Supplement: NIHMS1937076-supplement-323119_Data_Supplement.pdf [file NIHMS1937076-supplement-323119_Data_Supplement.pdf]

## **Supplemental Figure Legends**

Figure S1. Measurement of left ventricular ejection fraction (by echocardiography), systolic blood pressure (by invasive catheterization), cardiac output (by invasive catheterization), and left atrial diameter in mice subjected to 0, 2, 5, or 12 weeks of L-NAME in water and high fat diet. Representative M-mode images are also presented for mice at baseline vs 12 weeks of L-NAME and high fat diet.

Figure S2. Weight gain in mice after 2, 5, and 12 weeks of L-NAME in water and high fat diet compared to mice given normal water and a calorie neutral low fat diet. Weight gain is presented as a percent change from starting weight at the beginning of the study.

Figure S3. Western blot and quantification of relative density of bands for CD68 expression in whole lung lysate of mice given L-NAME in water and high fat diet for 2, 5, and 12 weeks.

Figure S4. Measurement of right ventricular systolic pressure, right ventricular end-diastolic pressure, Fulton index (ratio of right ventricular mass to left ventricular and septal mass), and IL1 $\beta$  levels by ELISA in whole lung lysate of 6 month old db/db mice.

Figure S5. Flow diagram of inclusion and selection criteria for identification of patients with heart failure with preserved ejection fraction and pulmonary hypertension who underwent clinically indicated autopsy at Vanderbilt University Medical Center.

Figure S6. (Top) Bar plot depiction of individual samples analyzed using single cell RNA sequencing technology and proportions of identified cell types. (Bottom) Expression pattern for identified cell types.

Figure S7. Transcript expression of select monocyte/macrophage-related transcripts by bulk RNA sequencing in mice treated with 5 weeks of L-NAME in water and high fat diet compared to normal water and low fat diet controls.

Figure S8. Western blot for CD68 expression in whole lung lysate of mice treated with L-NAME and high fat diet and either F4/80 (macrophage) neutralizing antibody or isotype control antibody. Measurement of weight gain, right ventricular systolic pressure, right ventricular end-diastolic pressure, and Fulton index (right ventricular mass to left ventricular and septal mass ratio) in mice treated with L-NAME/HFD and either isotype control or F4/80 neutralizing antibody. Representative images and quantification demonstrating muscularization of small vessels in mice treated with isotype control antibody compared to mice treated with F4/80 neutralizing antibody.

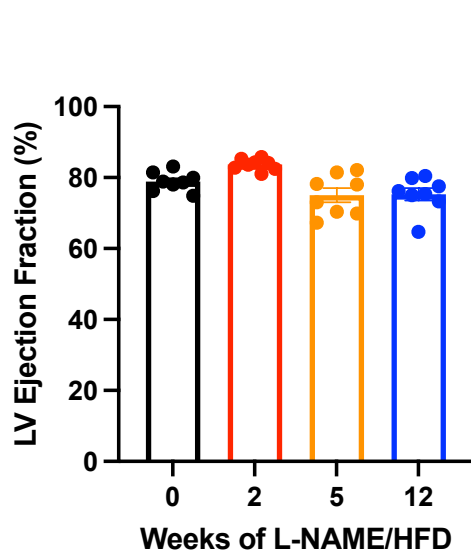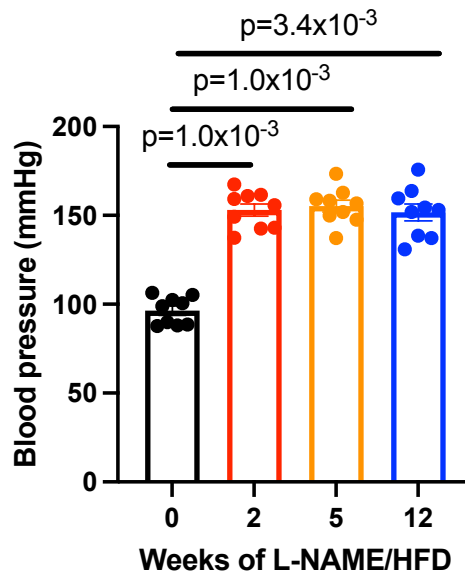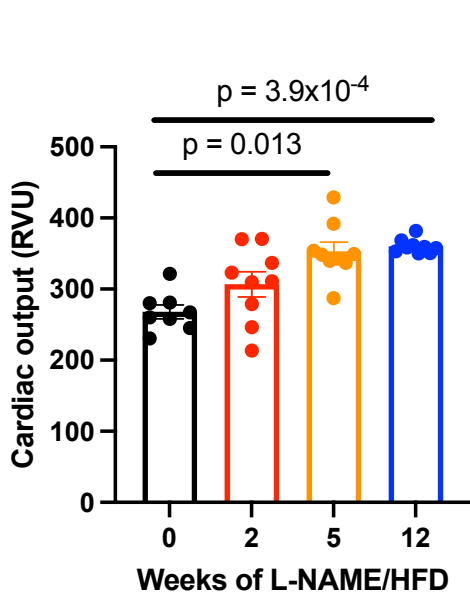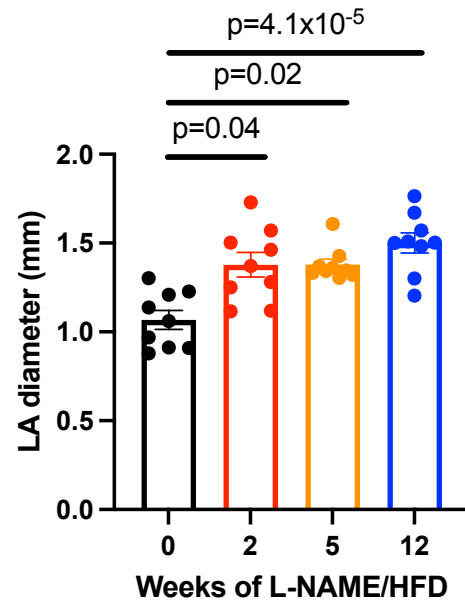

**0 weeks**

**LNAME/HFD  
12 weeks**

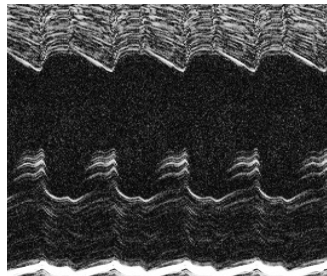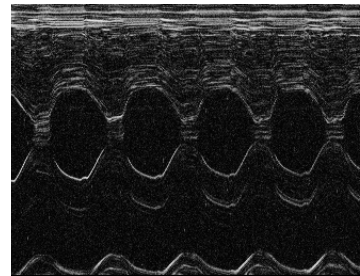

Supplementary Figure S1

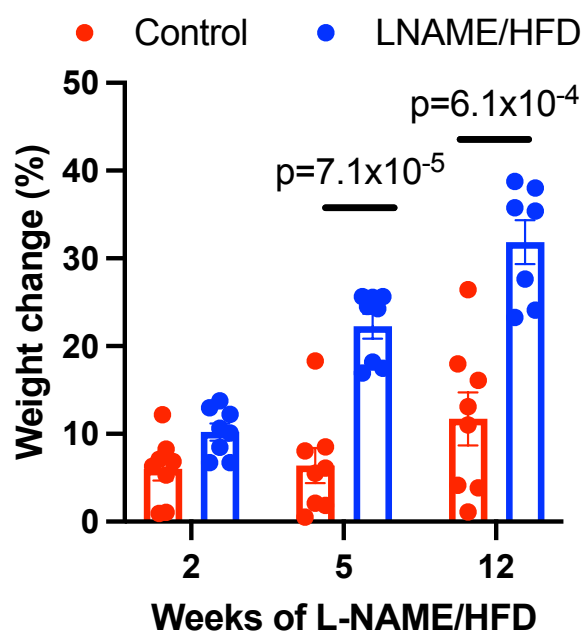

Supplementary Figure S2

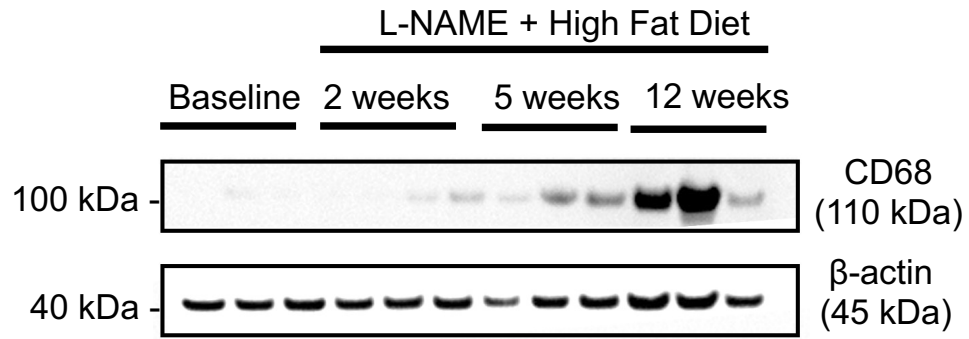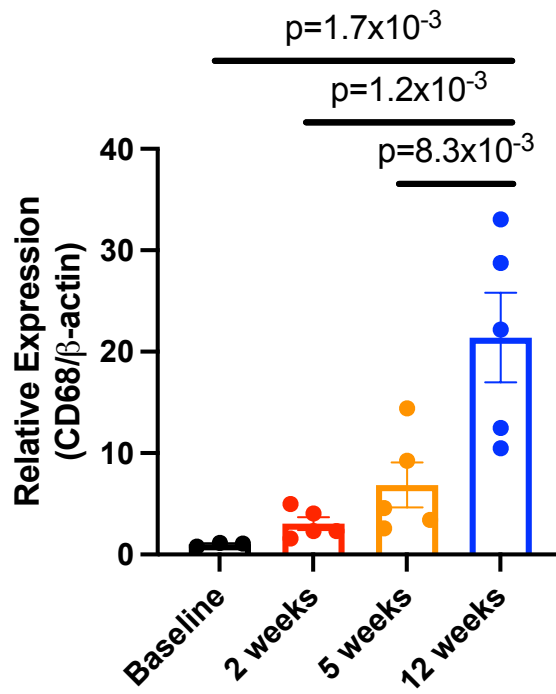

Supplementary Figure S3

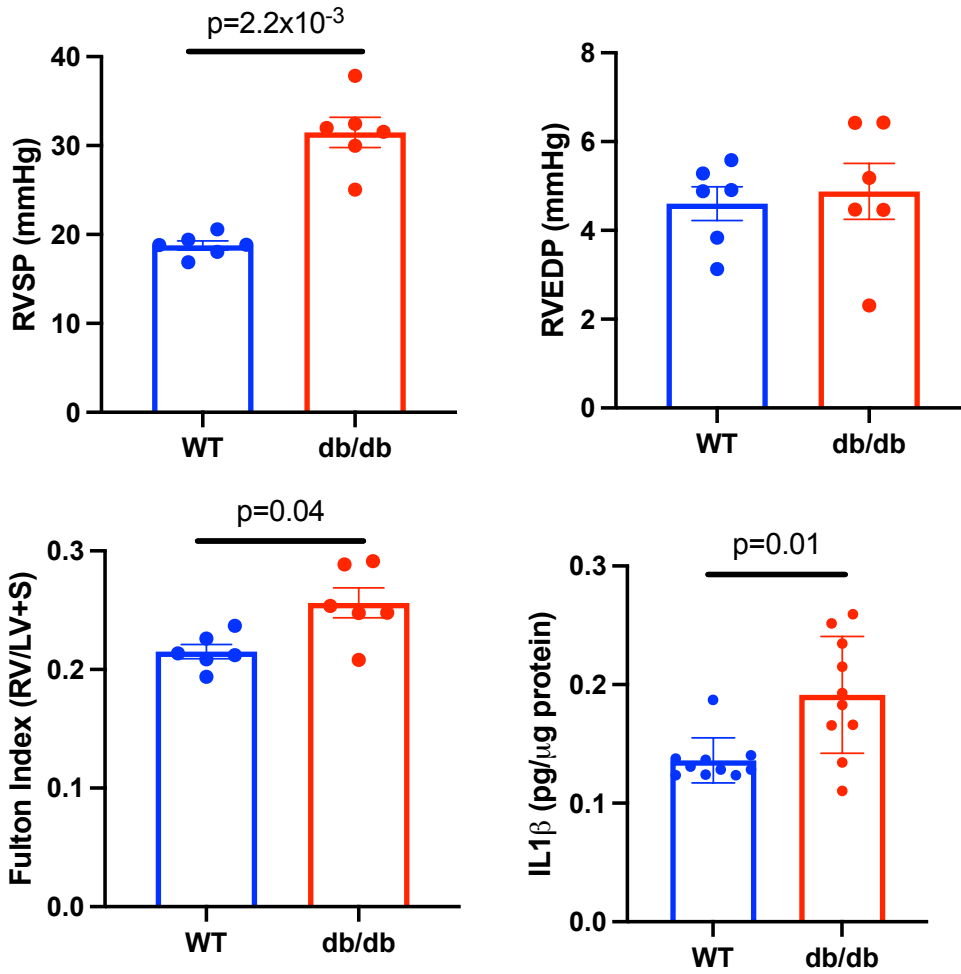

Supplementary Figure S4

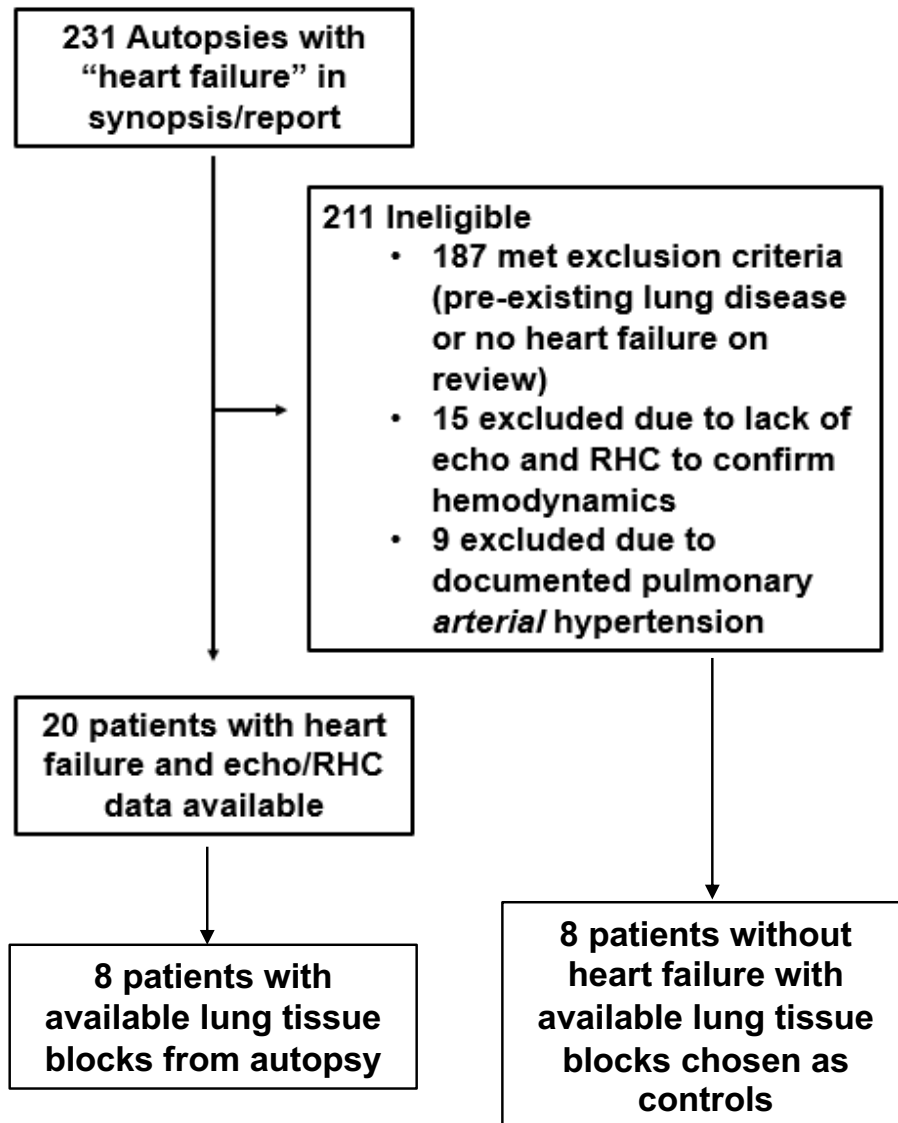

Supplementary Figure S5

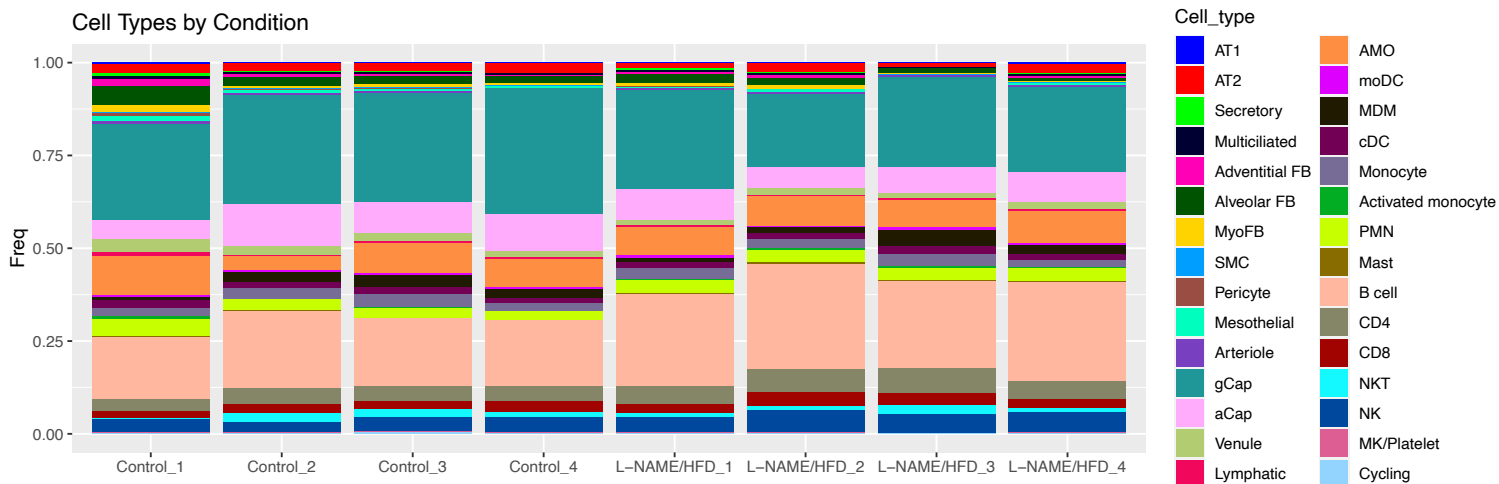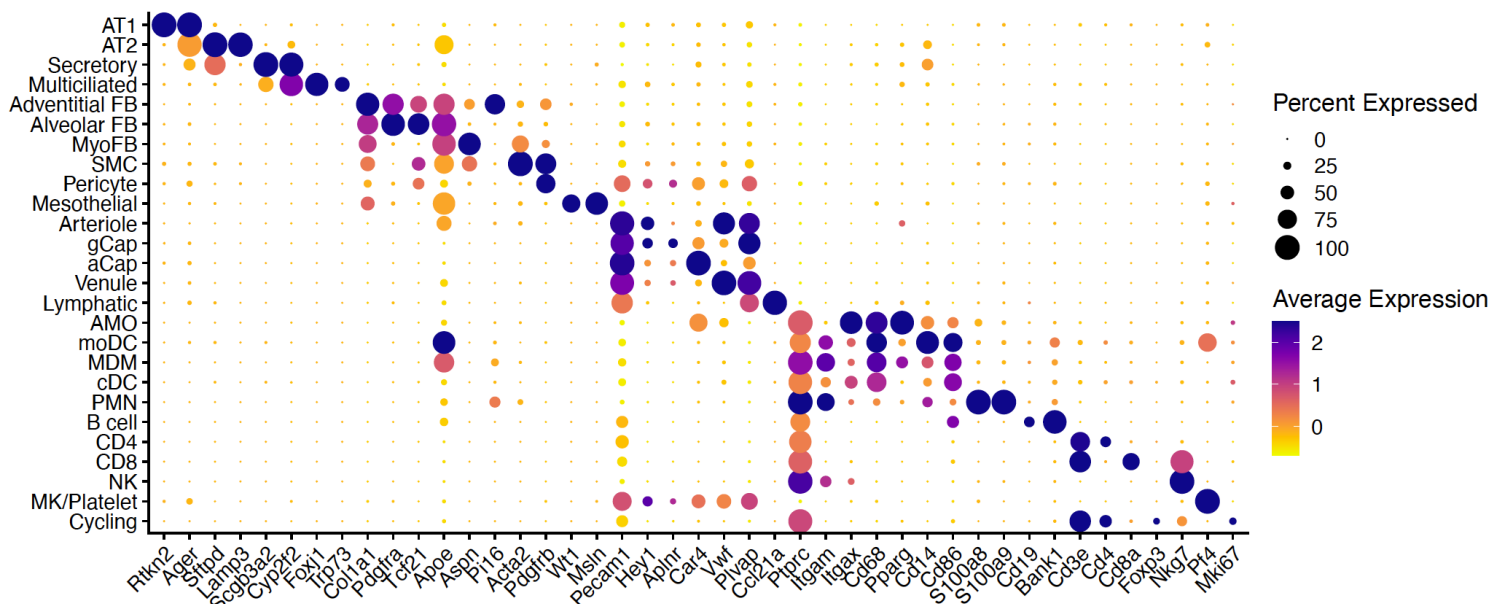

Supplementary Figure S6



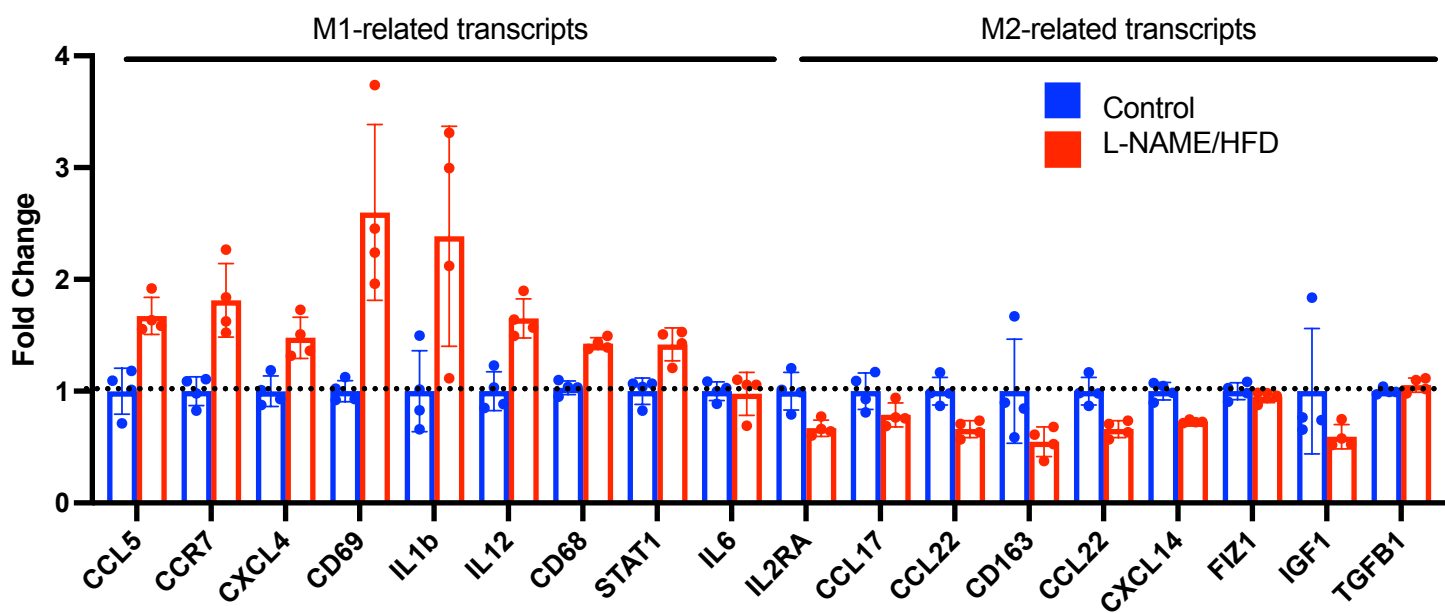

Supplementary Figure S7

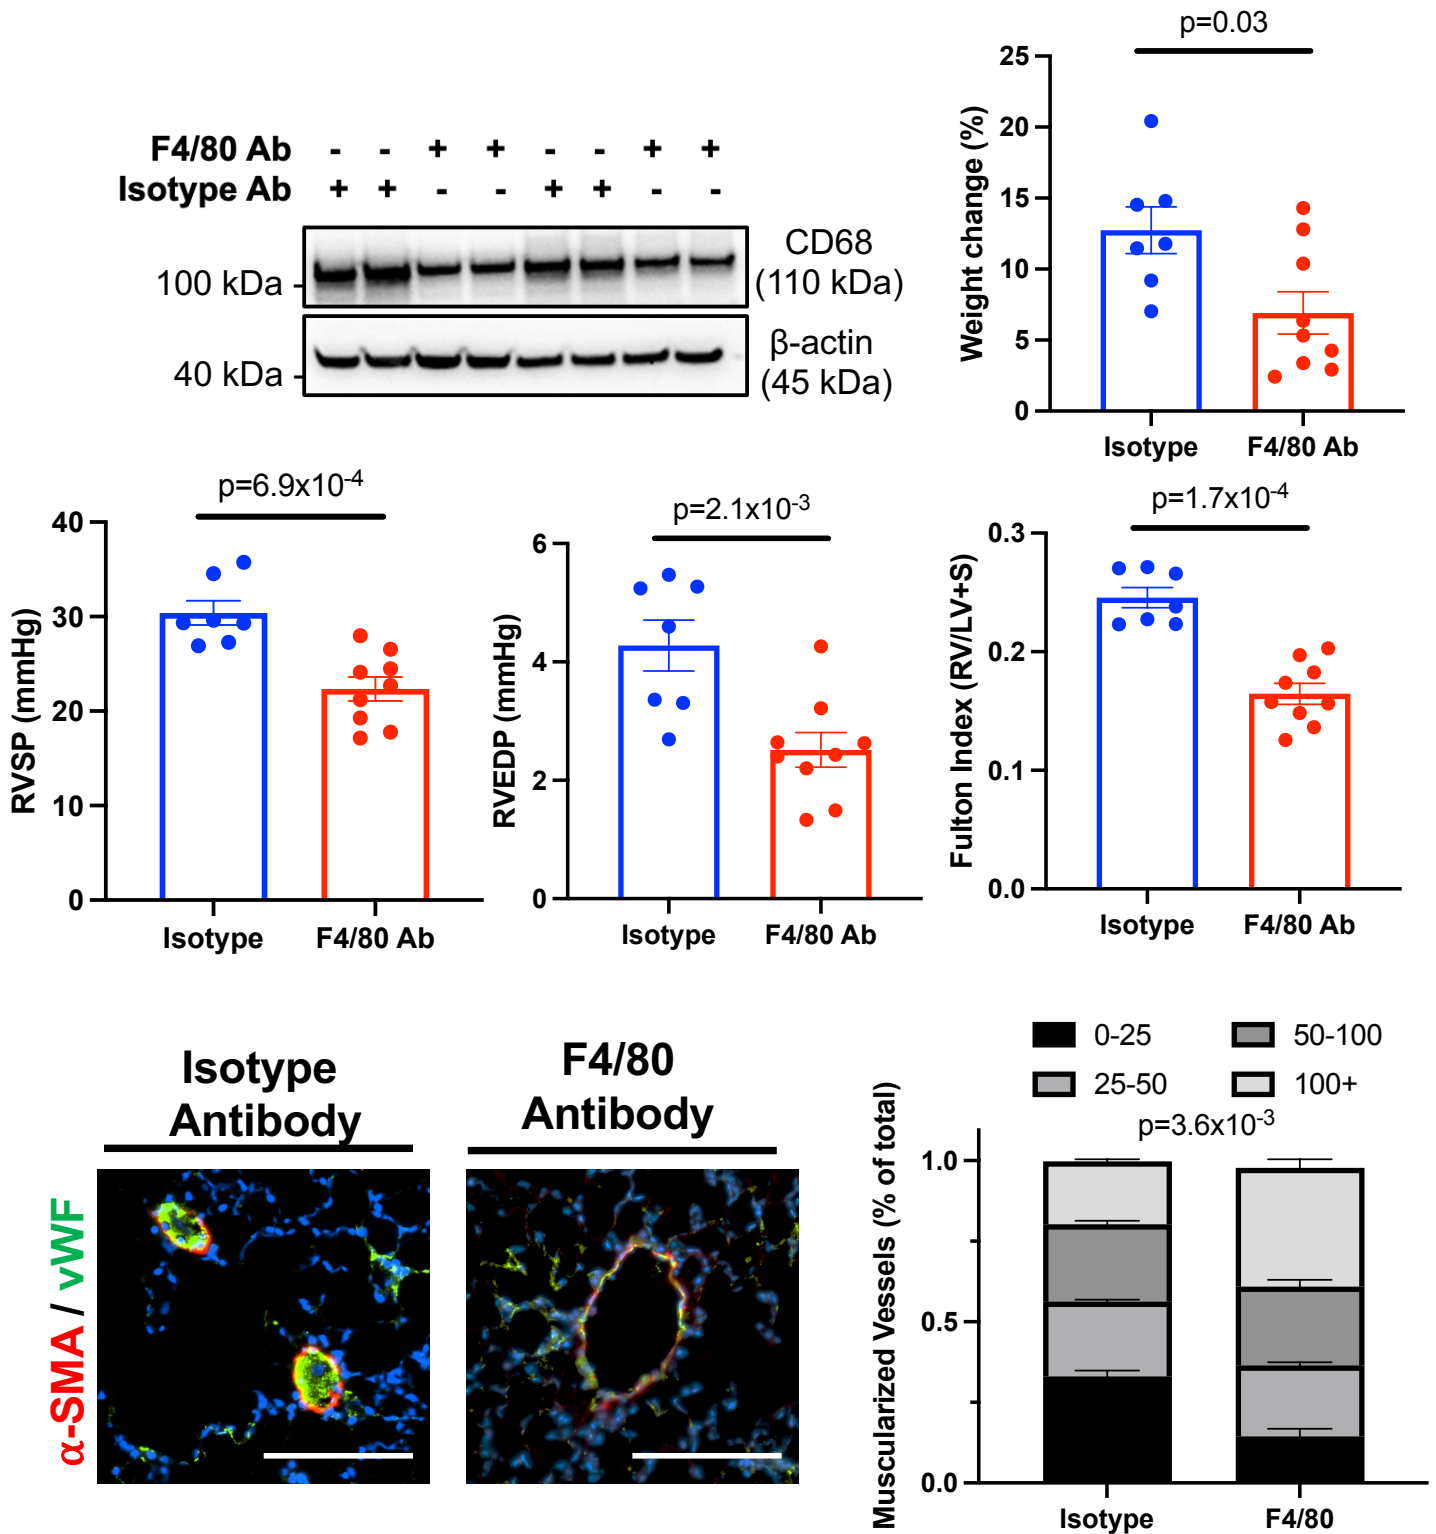

Supplementary Figure S8

| <b>Table S1. Over-represented gene ontologies in lungs of mice treated with L-NAME and high fat diet compared to control water and diet at 5 weeks.</b> |                                                      |                         |                          |                         |                         |                |                    |
|---------------------------------------------------------------------------------------------------------------------------------------------------------|------------------------------------------------------|-------------------------|--------------------------|-------------------------|-------------------------|----------------|--------------------|
| <b>GO</b>                                                                                                                                               | <b>Description</b>                                   | <b>Size of Ontology</b> | <b>Overlapping Genes</b> | <b>Expected Overlap</b> | <b>Enrichment Ratio</b> | <b>P-value</b> | <b>FDR p-value</b> |
| GO:0002682                                                                                                                                              | regulation of immune system process                  | 1230                    | 32                       | 9.853483715             | 3.247582371             | 2.45E-09       | 2.20E-05           |
| GO:0002684                                                                                                                                              | positive regulation of immune system process         | 879                     | 26                       | 7.041635923             | 3.692323813             | 7.45E-09       | 3.36E-05           |
| GO:0002252                                                                                                                                              | immune effector process                              | 678                     | 22                       | 5.431432487             | 4.050496817             | 2.41E-08       | 7.24E-05           |
| GO:0080134                                                                                                                                              | regulation of response to stress                     | 1227                    | 30                       | 9.829450827             | 3.052052503             | 3.45E-08       | 7.78E-05           |
| GO:0050776                                                                                                                                              | regulation of immune response                        | 705                     | 22                       | 5.647728471             | 3.895371407             | 4.80E-08       | 8.66E-05           |
| GO:0001775                                                                                                                                              | cell activation                                      | 893                     | 24                       | 7.153789396             | 3.354865327             | 1.81E-07       | 2.16E-04           |
| GO:0050865                                                                                                                                              | regulation of cell activation                        | 521                     | 18                       | 4.173711395             | 4.312708354             | 2.01E-07       | 2.16E-04           |
| GO:0031347                                                                                                                                              | regulation of defense response                       | 580                     | 19                       | 4.646358174             | 4.089224138             | 2.05E-07       | 2.16E-04           |
| GO:0042592                                                                                                                                              | homeostatic process                                  | 1809                    | 36                       | 14.49183093             | 2.484158157             | 2.15E-07       | 2.16E-04           |
| GO:0002697                                                                                                                                              | regulation of immune effector process                | 373                     | 15                       | 2.988088964             | 5.019930859             | 3.33E-07       | 3.00E-04           |
| GO:0002443                                                                                                                                              | leukocyte mediated immunity                          | 345                     | 14                       | 2.763782017             | 5.065522502             | 7.52E-07       | 5.90E-04           |
| GO:0050778                                                                                                                                              | positive regulation of immune response               | 572                     | 18                       | 4.582270475             | 3.928183658             | 7.85E-07       | 5.90E-04           |
| GO:0032101                                                                                                                                              | regulation of response to external stimulus          | 708                     | 20                       | 5.671761358             | 3.526241451             | 9.92E-07       | 6.88E-04           |
| GO:0045321                                                                                                                                              | leukocyte activation                                 | 784                     | 21                       | 6.280594498             | 3.343632519             | 1.22E-06       | 7.49E-04           |
| GO:0006955                                                                                                                                              | immune response                                      | 1293                    | 28                       | 10.35817434             | 2.703179061             | 1.25E-06       | 7.49E-04           |
| GO:0022407                                                                                                                                              | regulation of cell-cell adhesion                     | 369                     | 14                       | 2.956045114             | 4.736057624             | 1.66E-06       | 8.94E-04           |
| GO:0002694                                                                                                                                              | regulation of leukocyte activation                   | 482                     | 16                       | 3.861283862             | 4.143699498             | 1.69E-06       | 8.94E-04           |
| GO:0002274                                                                                                                                              | myeloid leukocyte activation                         | 194                     | 10                       | 1.5541267               | 6.434481823             | 3.78E-06       | 0.001848402        |
| GO:0002250                                                                                                                                              | adaptive immune response                             | 397                     | 14                       | 3.180352061             | 4.402028371             | 3.89E-06       | 0.001848402        |
| GO:0051707                                                                                                                                              | response to other organism                           | 942                     | 22                       | 7.546326552             | 2.915325735             | 6.17E-06       | 0.002693107        |
| GO:0043207                                                                                                                                              | response to external biotic stimulus                 | 945                     | 22                       | 7.570359439             | 2.906070732             | 6.49E-06       | 0.002693107        |
| GO:0032102                                                                                                                                              | negative regulation of response to external stimulus | 305                     | 12                       | 2.443343523             | 4.911302847             | 6.57E-06       | 0.002693107        |
| GO:0002764                                                                                                                                              | immune response-regulating signaling pathway         | 310                     | 12                       | 2.483398335             | 4.832088285             | 7.75E-06       | 0.003036618        |
| GO:0002449                                                                                                                                              | lymphocyte mediated immunity                         | 261                     | 11                       | 2.090861178             | 5.260990119             | 8.47E-06       | 0.003099585        |
| GO:0002253                                                                                                                                              | activation of immune response                        | 368                     | 13                       | 2.948034152             | 4.409718249             | 8.59E-06       | 0.003099585        |
| GO:0045088                                                                                                                                              | regulation of innate immune response                 | 267                     | 11                       | 2.138926953             | 5.142765622             | 1.05E-05       | 0.003440007        |
| GO:0072676                                                                                                                                              | lymphocyte migration                                 | 94                      | 7                        | 0.753030463             | 9.295772676             | 1.05E-05       | 0.003440007        |
| GO:0009607                                                                                                                                              | response to biotic stimulus                          | 977                     | 22                       | 7.826710235             | 2.810887249             | 1.09E-05       | 0.003440007        |
| GO:0012501                                                                                                                                              | programmed cell death                                | 1874                    | 33                       | 15.01254348             | 2.198161827             | 1.11E-05       | 0.003440007        |
| GO:0030155                                                                                                                                              | regulation of cell adhesion                          | 639                     | 17                       | 5.119004954             | 3.320957911             | 1.49E-05       | 0.004488588        |

| <b>Table S2. Patient Characteristics of PH-HFpEF and Control Patients Who Underwent Autopsy</b> |                       |                       |
|-------------------------------------------------------------------------------------------------|-----------------------|-----------------------|
|                                                                                                 | <b>PH-HFpEF (n=8)</b> | <b>Controls (n=8)</b> |
| <b>Age (years)</b>                                                                              | 63 ± 12               | 64 ± 9                |
| <b>Female Sex (n - %)</b>                                                                       | 3 (37.5)              | 2 (25)                |
| <b>Comorbidities (n - %)</b>                                                                    |                       |                       |
| <b>Hypertension</b>                                                                             | 7 (87.5)              | 6 (75)                |
| <b>Diabetes Mellitus</b>                                                                        | 6 (75)                | 4 (50)                |
| <b>Obesity</b>                                                                                  | 6 (75)                | 4 (50)                |
| <b>Heart Failure</b>                                                                            | 8 (100)               | 0 (0)                 |
| <b>Atrial Fibrillation</b>                                                                      | 3 (37.5)              | 0 (0)                 |
| <b>Hyperlipidemia</b>                                                                           | 7 (87.5)              | 4 (50)                |
| <b>LVEF (%)</b>                                                                                 | 64 ± 5                | -                     |
| <b>RA (mmHg)</b>                                                                                | 13 ± 4                | -                     |
| <b>mPAP (mmHg)</b>                                                                              | 44 ± 13               | -                     |
| <b>PAWP (mmHg)</b>                                                                              | 25 ± 7                | -                     |
| <b>PVR (Wood Units)</b>                                                                         | 4.4 ± 2.1             | -                     |
| <b>Indirect Fick CO (L/min)</b>                                                                 | 4.3 ± 0.4             | -                     |
| <b>Indirect Fick CI (L/min/m<sup>2</sup>)</b>                                                   | 2.3 ± 0.2             | -                     |

*PH-HFpEF = pulmonary hypertension and heart failure with preserved ejection fraction*

*LVEF = left ventricular ejection fraction)*

*RA = right atrial pressure*

*mPAP = mean pulmonary arterial pressure*

*PAWP = pulmonary arterial wedge pressure*

*PVR = pulmonary vascular resistance*
