# Supplementary material
Source: PubMed Central journal article supplement (PMC10655859)
Supplement: NIHMS1937076-supplement-323119_Major_Resources_Table.pdf [file NIHMS1937076-supplement-323119_Major_Resources_Table.pdf]

## Major Resources Table

In order to allow validation and replication of experiments, all essential research materials listed in the Methods should be included in the Major Resources Table below. Authors are encouraged to use public repositories for protocols, data, code, and other materials and provide persistent identifiers and/or links to repositories when available. Authors may add or delete rows as needed.

### Animals (in vivo studies)

| Species    | Vendor or Source     | Background Strain | Sex | Persistent ID / URL |
|------------|----------------------|-------------------|-----|---------------------|
| C57BL6/J   | Jackson Laboratories | C57BL6/J          | M   | 000664              |
| C57BL6/J   | Jackson Laboratories | C57BL6/J          | F   | 000664              |
| Db/db mice | Jackson Laboratories | C57BL6/J          | M/F | 000697              |

### Genetically Modified Animals

|                 | Species | Vendor or Source | Background Strain | Other Information | Persistent ID / URL |
|-----------------|---------|------------------|-------------------|-------------------|---------------------|
| Parent - Male   |         |                  |                   |                   |                     |
| Parent - Female |         |                  |                   |                   |                     |

### Antibodies

| Target antigen                        | Vendor or Source  | Catalog #   | Working concentration | Lot # (preferred but not required) | Persistent ID / URL                            |
|---------------------------------------|-------------------|-------------|-----------------------|------------------------------------|------------------------------------------------|
| CD68                                  | Invitrogen        | MA5-13324   | 1:1000                |                                    |                                                |
| IL1b                                  | Cell Signal       | 31202       | 1:1000                |                                    | Clone D6D6T                                    |
| Alpha SMA                             | Dako              | M0851       | 1:100                 |                                    | Clone 1A4                                      |
| VWF                                   | Dako              | A0082       | 1:100                 |                                    |                                                |
| IL1b Neutralizing Ab                  | BioXCell          | BE0246      | 1 mg/ml               |                                    | 100 microgram per dose injected                |
| Isotype Ab for IL1b                   | BioXCell          | BE0091      | 1 mg/ml               |                                    | 100 microgram per dose injected                |
| F4/80 Neutralizing ab                 | BioXcell          | BE0206      | 1 mg/ml               |                                    | 100 microgram per dose injected                |
| Isotype Ab for F4/80                  | BioXCell          | BE0090      | 1 mg/ml               |                                    | 100 microgram per dose injected                |
| Hashing Abs for sc-RNA-Seq            | Biolegend         | B0301-B0304 | 1:100                 |                                    | 1:100 dilution in 100 microliters of 1e6 cells |
| Donkey anti-mouse IgG HRP conjugated  | Thermo/Invitrogen | A16017      | 1:5000                |                                    |                                                |
| Donkey anti-rabbit IgG HRP conjugated | Thermo/Invitrogen | A16023      | 1:5000                |                                    |                                                |

### DNA/cDNA Clones

| Clone Name | Sequence | Source / Repository | Persistent ID / URL |
|------------|----------|---------------------|---------------------|
|            |          |                     |                     |
|            |          |                     |                     |
|            |          |                     |                     |

### Cultured Cells

| Name | Vendor or Source | Sex (F, M, or unknown) | Persistent ID / URL |
|------|------------------|------------------------|---------------------|
|      |                  |                        |                     |

DOI [to be added]

|  |  |  |  |
|--|--|--|--|
|  |  |  |  |
|  |  |  |  |
|  |  |  |  |

## Data & Code Availability

| Description                         | Source / Repository | Persistent ID / URL                                                                                 |
|-------------------------------------|---------------------|-----------------------------------------------------------------------------------------------------|
| Single cell sequencing process code | Website             | <a href="https://github.com/kropskilab/myeloid_il1b">https://github.com/kropskilab/myeloid_il1b</a> |
|                                     |                     |                                                                                                     |
|                                     |                     |                                                                                                     |

## Other

| Description                | Source / Repository | Persistent ID / URL         |
|----------------------------|---------------------|-----------------------------|
| Clodronate + PBS Liposomes | Liposoma            | Batches: C29E0622, P20E0522 |
| PBS Liposomes              |                     |                             |
|                            |                     |                             |

## ARRIVE GUIDELINES

The ARRIVE guidelines (<https://arriveguidelines.org/>) are a checklist of recommendations to improve the reporting of research involving animals. Key elements of the study design should be included below to better enable readers to scrutinize the research adequately, evaluate its methodological rigor, and reproduce the methods or findings.

## Study Design

| Groups                            | Sex | Age     | Number (prior to experiment) | Number (after termination) | Littermates (Yes/No) | Other description                                                                                  |
|-----------------------------------|-----|---------|------------------------------|----------------------------|----------------------|----------------------------------------------------------------------------------------------------|
| Group 1 (Control)                 | M/F | 8 weeks | 9                            | 9                          | NA                   | Directly purchased from Jackson and sacrificed at day 0                                            |
| Group 2 (L-NAME + HFD 2 weeks)    | M/F | 8 weeks | 9                            | 9                          | NA                   | Directly purchased from Jackson and sacrificed after 2 weeks of L-NAME in water and high fat diet  |
| Group 3 (L-NAME/HFD for 5 weeks)  | M/F | 8 weeks | 9                            | 9                          | NA                   | Directly purchased from Jackson and sacrificed after 5 weeks of L-NAME in water and high fat diet  |
| Group 4 (L-NAME/HFD for 12 weeks) | M/F | 8 weeks | 9                            | 9                          | NA                   | Directly purchased from Jackson and sacrificed after 12 weeks of L-NAME in water and high fat diet |
| Group 5 (L-NAME/HFD for 5 weeks)  | M/F | 8 weeks | 8                            | 8                          | NA                   | Directly purchased, but sacrificed for bulk RNA-seq (n=4) and single cell RNA-seq (n=4)            |
| Group 6 (control for 5 weeks)     | M/F | 8 weeks | 8                            | 8                          | NA                   | Directly purchased, but sacrificed for bulk RNA-seq (n=4) and single cell                          |

DOI [to be added]

|                                                |     |          |    |    |    |                                                                                                          |
|------------------------------------------------|-----|----------|----|----|----|----------------------------------------------------------------------------------------------------------|
|                                                |     |          |    |    |    | RNA-seq (n=4) after 5 weeks of normal diet and water                                                     |
| Group 7<br>(Clodronate + L-NAME/HFD)           | M/F | 8 weeks  | 8  | 8  | NA | Directly purchased, sacrificed after 5 weeks of clodronate liposome IP injection and L-NAME/HFD          |
| Group 8 (PBS liposome + L-NAME/HFD)            | M/F | 8 weeks  | 10 | 10 | NA | Directly purchased, sacrificed after 5 weeks of PBS liposome IP injection and L-NAME/HFD                 |
| Group 9 (IL1b injection + L-NAME/HFD)          | M/F | 8 weeks  | 8  | 8  | NA | Directly purchased, sacrificed after 5 weeks of L-NAME/HFD and 2 weeks of IL1b injection                 |
| Group 10 (Isotype injection + LNAME/HFD)       | M/F | 8 weeks  | 8  | 8  | NA | Directly purchased, sacrificed after 5 weeks of L-NAME/HFD and 2 weeks of Isotype Ab injection           |
| Group 11 (F4/80 Ab Injection + LNAME/HFD)      | M/F | 8 weeks  | 8  | 8  | NA | Directly purchased, sacrificed after 5 weeks of L-NAME/HFD and 2 weeks of F4/80 Ab injection             |
| Group 12 (Isotype Ab + LNAME/HFD for F4/80 Ab) | M/F | 8 weeks  | 8  | 8  | NA | Directly purchased, sacrificed after 5 weeks of L-NAME/HFD and 2 weeks of Isotype Ab injection for F4/80 |
| Group 14 (db/db mice)                          | M/F | 24 weeks | 6  | 6  | NA | Directly purchased and sacrificed at correct age                                                         |
| Group 15 (C57BL6/J mice)                       | M/F | 24 weeks | 6  | 6  | NA | Directly purchased as control for Group 14 and sacrificed at correct age                                 |

Various controls

114 total mice

**Sample Size:** Please explain how the sample size was decided Please provide details of any a *prior* sample size calculation, if done.

Based on prior studies, we aimed to identify a 20% change in outcomes (primary outcome of RV systolic pressure) with underlying 15% variance in measurements between mice. With  $\alpha = 0.05$ , and  $\beta = 0.2$ , we expected a sample size of 8 mice per group to be adequate to detect differences between groups.

DOI [to be added]

**Inclusion Criteria**

Inclusion criteria included mice that arrived after purchase from Jackson Laboratories in good and healthy condition, defined by normal physical appearance and activity.

**Exclusion Criteria**

No mice were excluded from the study once the study began.

**Randomization**

Mice were randomized by even/odd number into each experimental group after direct purchase

**Blinding**

Scientists were not blinded to the experimental group for each mouse.
