# Supplementary material
Source: PubMed Central journal article supplement (PMC10655859)

**Full blot for CD68 (Suppl Fig 3)**

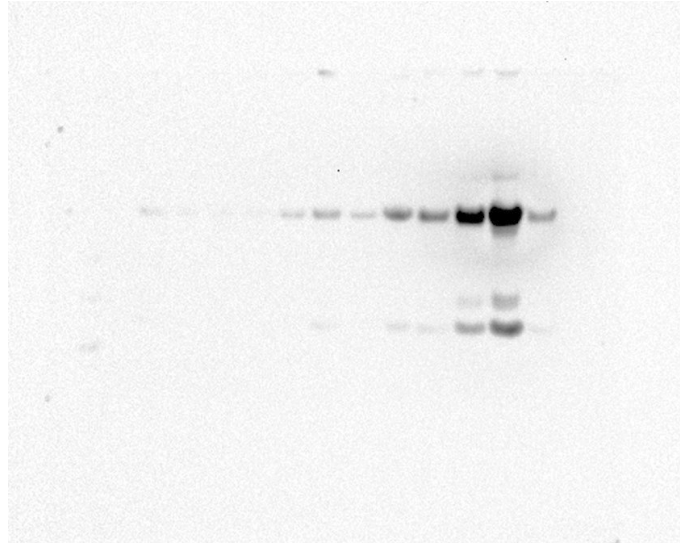

**Full blot for beta actin**

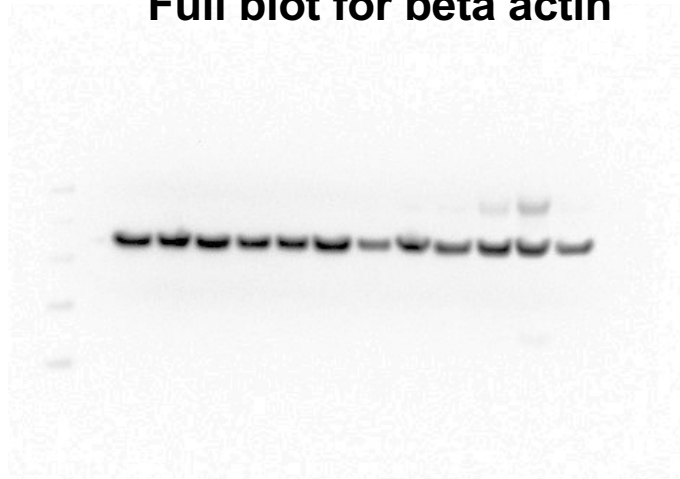

**Full blot (total protein stain) –  
to properly show ladder and loading**

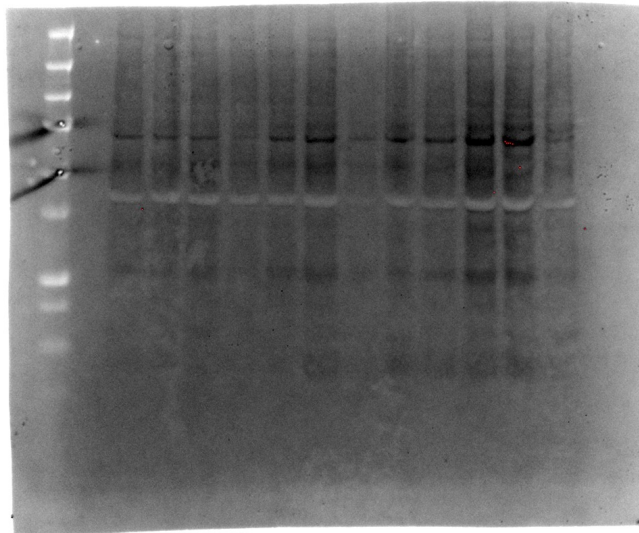

**Full blot for CD68 (PBS liposomes left 4, clodronate right 4)  
Figure 6**

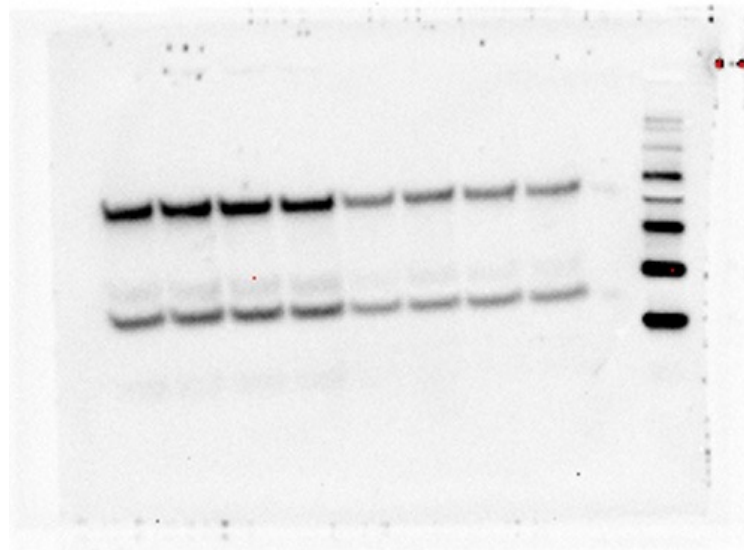

**Full blot for beta actin**

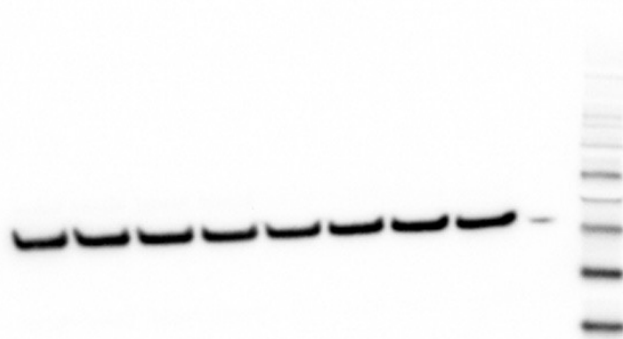

**Full blot for IL1b**

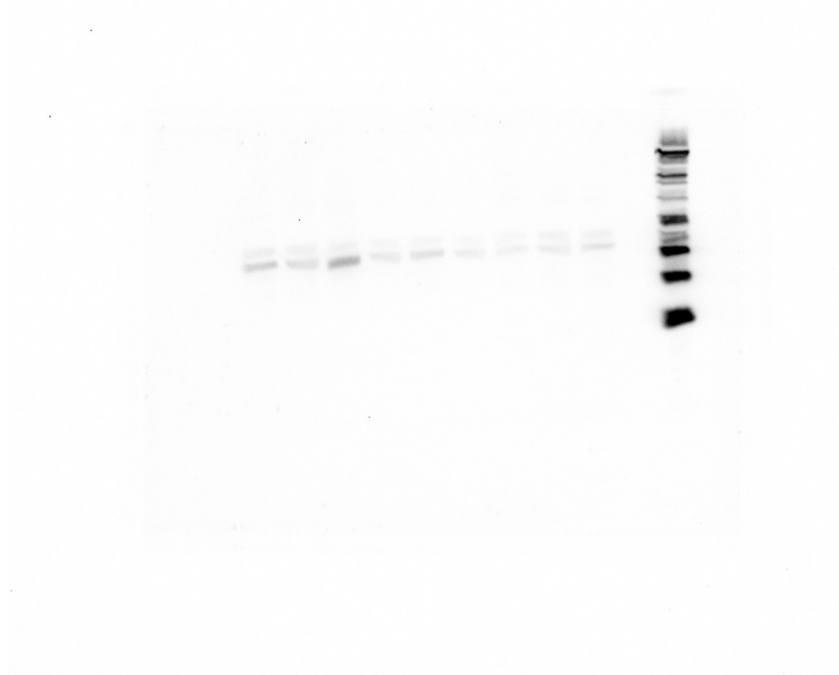

**Full blot for beta-actin**

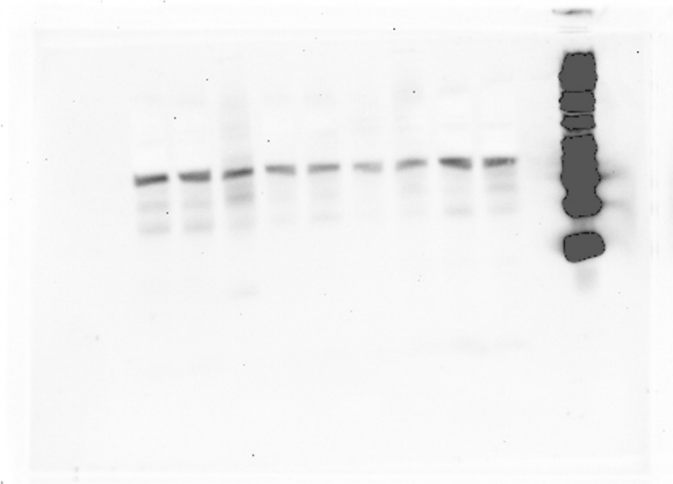

**Full blot for CD68 after F4/80 or  
isotype antibody treatment (Suppl Fig 8)**

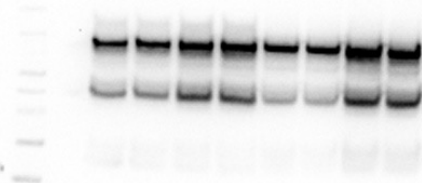

**Full blot for accompanying beta actin**

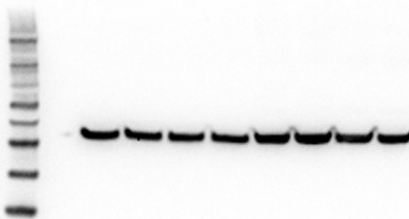

Supplement: NIHMS1937076-supplement-323119_Uncut_Gel_Blots.pdf [file NIHMS1937076-supplement-323119_Uncut_Gel_Blots.pdf]
